# Supplementary material for: Hierarchical h-, m- and n-BiPO4 microspheres: facile synthesis and application in the photocatalytic decomposition of refractory phenols and benzene
Source: Royal Society of Chemistry journal article supplement (doi:10.1039/c7ra06560d), 2017-01-01
Supplement: c7ra06560d1.pdf [file c7ra06560d1.pdf]

## Supplementary Information

### Hierarchical h-, m- and n-BiPO<sub>4</sub> microspheres: Facile synthesis and application

#### in the photocatalytic decomposition of refractory phenols and benzene

Xiaoxin Tian<sup>a</sup>, Tong Xu<sup>b</sup>, Yunjian Wang<sup>b</sup> and Sugang Meng<sup>b,c\*</sup>

<sup>a</sup> College of Chemistry and Chemical Engineering, Xinxiang University, Xinxiang 453003, Henan, China

<sup>b</sup> College of Chemistry and Materials Science, Huaibei Normal University, Huaibei 235000, Anhui, China

<sup>c</sup> Anhui Key Laboratory of Energetic Materials, Huaibei 235000, Anhui, China

\* Corresponding author Tel: +86-561-3802235; Fax: +86-561-3090518;

E-mail: mentsugang@126.com

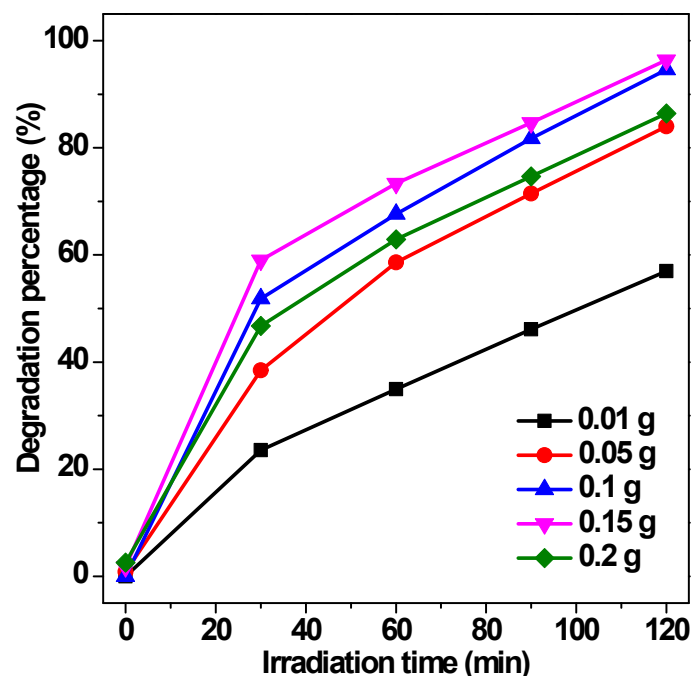

Fig. S1. Photocatalytic degradation curves of BPA (20 mg/L) for different amount of n-BiPO<sub>4</sub> under UV light irradiation.

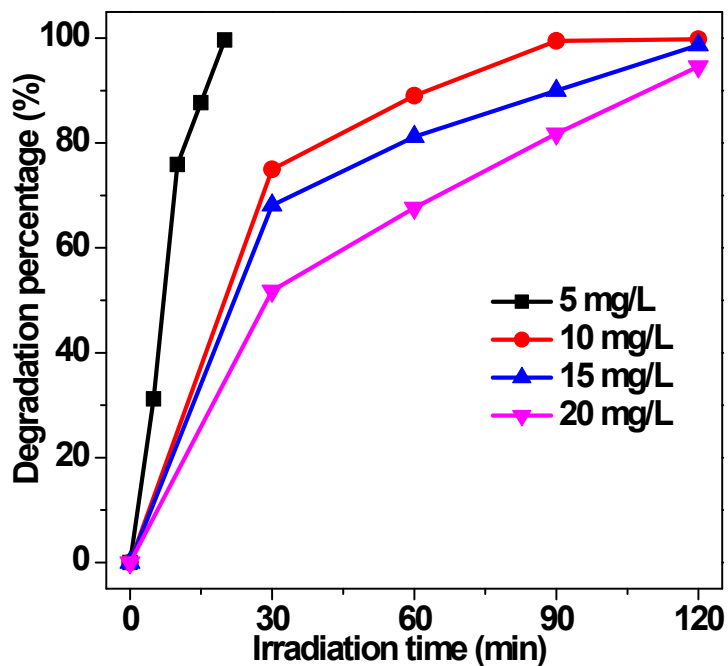

Fig. S2. Photocatalytic degradation curves of different concentrations of BPA for n-BiPO<sub>4</sub> (0.1 g) under UV light irradiation.

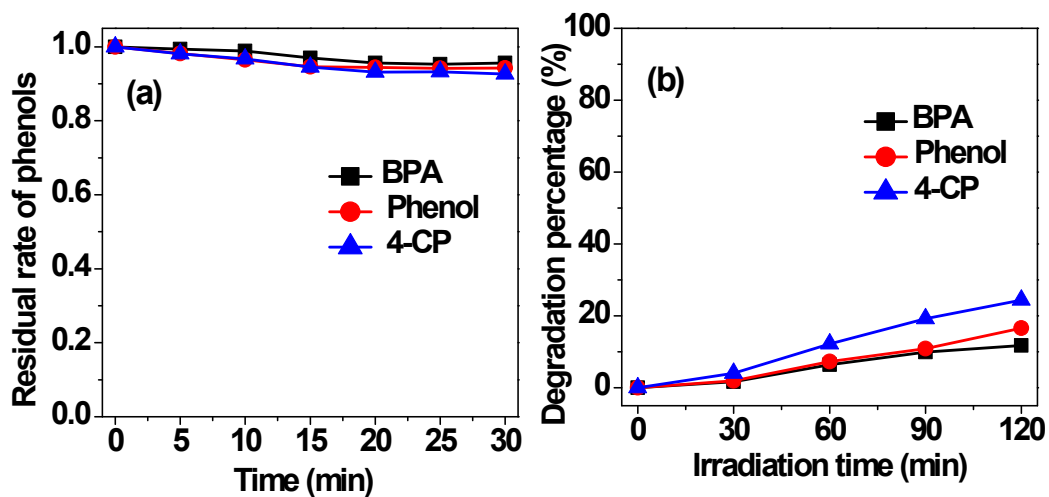

Fig. S3. (a) The dark adsorption test in the absence of irradiation but with n-BiPO<sub>4</sub> (0.1 g). (b) The blank tests (without photocatalyst) under UV light irradiation.

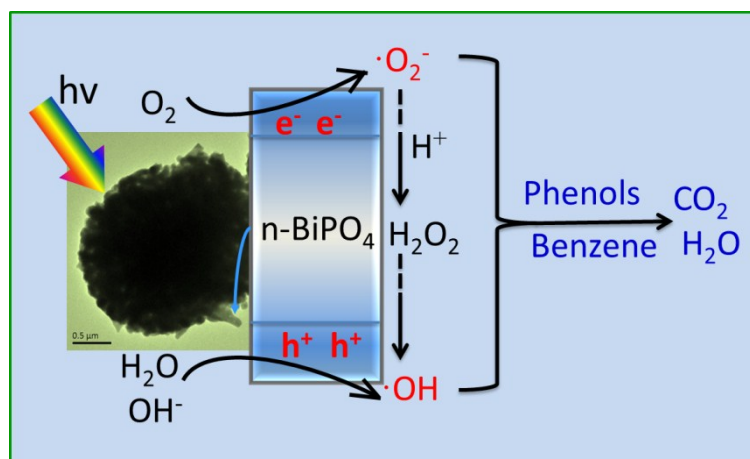

Fig. S4. Proposed mechanism of photocatalytic degradation of phenols and benzene over  $n\text{-BiPO}_4$ .
